# Supplementary material for: Probabilistic Photonic Computing with Chaotic Light
Source: Research Square preprint supplement (doi:10.21203/rs.3.rs-3873286/v1), 2024-07-23
Supplement: Supplementary file 1 [file 0fbd927de1aa560fe9b6c285.docx]

Supplementary Information for

Probabilistic Photonic Computing with Chaotic Light

*Frank Brückerhoff-Plückelmann1, Hendrik Borras2, Bernhard Klein2, Akhil Varri1, Marlon Becker3,4, Jelle Dijkstra5, Martin Brückerhoff6, C. David Wright7, Martin Salinga8, Harish Bhaskaran9, Benjamin Risse3,4, Holger Fröning2, Wolfram Pernice1,5**

1Physical Institute, University of Münster; Münster, 48149, Germany.

2Institute of Computer Engineering, University of Heidelberg; Heidelberg, 69120, Germany.

3Institute for Geoinformatics, University of Münster; Münster, 48149, Germany.

4Faculty of Mathematics & Computer Science, University of Münster; Münster, 48149, Germany

5Kirchhoff-Institute for Physics, University of Heidelberg; Heidelberg, 69120, Germany.

6DEVK RE; Cologne, 50668, Germany.

7Department of Engineering, University of Exeter; Exeter, EX44QF, UK.

8Institute of Materials Physics, University of Münster; Münster, 48149, Germany.

9Department of Materials, University of Oxford; Oxford, OX43PJ, UK.

*Correspondence to: wolfram.pernice@kip.uni-heidelberg.de

**Chaotic Light as a tunable random number generator**

Chaotic light, for example from an amplified spontaneous emission (ASE) source, can be described as the superposition of many oscillating electric fields of different frequencies with random phase and random intensity:

Here and are both zero mean gaussian distributed random variables with a variance proportional to the spectral power density (*27*). The interference between all frequency components causes a time varying field intensity. Thus, the number of incident photons measured at a detector within a measurement interval follows a M-fold Bose-Einstein distribution (*28-30*). The degeneracy factor M depends on the ratio between the coherence time of the optical field and the measurement time (*28*). In the case of large mean photon numbers obtained within a measurement interval T, the probability density function of the M-fold Bose Einstein distribution can be simplified to:

The degeneracy factor , which corresponds to the number of independent temporal coherence cells of the ASE within the measurement interval, asymptotically approaches in the limit  *(28)*. Overall, the photon number fluctuations lead to a second noise source apart from the shot noise which is proportional to the squared mean photon number:

**Extended Data Fig. 2a** shows the relative variance of the photon number distribution. For the simulation, we assume a chaotic light field with a rectangular spectral power density that has a width of 200 GHz. The relative variance decreases for increasing measurement times as the number of independent temporal coherence cells within the measurement interval increases. We fit a Bose-Einstein to the photon count statistics in **Extended Data Fig. 2b** for a measurement interval of 50 ps. The fit converges to a degeneracy factor of M = 10.64 comparable to the asymptotic approximation of M = 10. Most importantly, the variance is proportional to the squared mean photon number and thus the relative noise level does not approach zero for large photon numbers as for the shot noise term. Thus, we can modulate the noise level by modulating the mean photon number.

Since the number of photons within a time interval is directly linked to the optical intensity, we can use this effect to also modulate the signal to noise ratio. In the following, we model our detection system by a low pass filter with rectangular shape and a cutoff frequency of 30 GHz. **Extended Data Fig. 3a** shows the simulated intensity profile for a chaotic light source discarding the terms oscillating with the frequency of the wave (approximately 193 THz). The traces contain various frequencies components given by the beating between the spectral components of the broadband light source. In case the optical bandwidth is smaller than the cutoff frequency of the detector, the detector can resolve all frequency components, corresponding to a voltage trace proportional to the intensity. In the other case, the detector acts as a low pass filter and removes the higher order components in the intensity trace, effectively smoothing the signal as shown in **Extended Data Fig. 3b**. Therefore, the signal to noise ratio depends on the ratio between the optical and electrical bandwidth. It remains unity for optical bandwidths smaller than the detector cutoff and increases for larger bandwidths due to the smoothening of the lowpass filter as shown in **Extended Data Fig. 3c**. Setting the ratio between the optical and electrical bandwidth allows to set the signal to noise ratio of the system even in the case of large photon numbers and intensities. Finally, we encode our symbols in the mean intensity of the chaotic light source, see **Fig. 2a** in the main text. To ensure that two symbols are uncorrelated, the time between them must be larger than the correlation time of the chaotic source itself. In the case that the optical bandwidth is smaller than the electrical one, the autocorrelation of the output voltage is given by the second order degree of coherence of the chaotic light field and is 2 for zero time-lag. In case that the optical bandwidth exceeds the electrical one, the autocorrelation for zero time-lag decreases and the characteristic time scale is given by the electrical bandwidth of the system. In our case of 200 GHz optical bandwidth and an electrical bandwidth of around 30 GHz, the time between two symbols of 56.8 ps ensures that they are uncorrelated.

**Interference of chaotic light**

The superposition of two independent chaotic light source populating the same optical frequencies behaves like a single chaotic light source since the sum of two independent zero mean gaussian random variables is again a zero mean gaussian random variable. As the variances add up, the intensities of the fields are also summed up. To avoid deploying several chaotic light sources, we deploy delay lines instead as sketched in **Extended Data Fig. 4a**. The inference between the various frequency components will strongly impact the measured output distribution if the delay time is short in comparison to the coherence time of the chaotic field as we practically implement a Mach-Zehnder interferometer. However, the interference of the field with its delayed copy behaves like the sum of two independent fields for large delay times. We simulate the detector signal for our system with an optical bandwidth of 200 GHz and an electrical bandwidth of 30 GHz. **Extended Data Fig. 4b** shows the mean detector voltage depending on the delay time. The output voltage follows the first order degree of coherence and approaches 0.5 for delay times larger than the coherence time, effectively adding up the intensities in both arms. Since the Mach-Zehnder configuration acts like a spectral filter and hence impacts the optical bandwidth, the SNR at the detector strongly depends on the delay time for small delays as shown in **Extended Data Fig. 4c**. However, for large delays, the SNR approaches the one of a single chaotic light source again. We compare the probability density function in the cases of no delay, a delay in the order of the coherence length and a delay much longer than the coherence time. For a short delay, the PDF has a different shape than a single chaotic light source but recovers the initial form for larger delay times. The PDF can also be nonzero for negative voltages even though the intensity is inherently positive, since the voltage is proportional to the low pass filtered intensity.

**System Probability Density Function**

Apart from noise contributions arising from the chaotic light and electronic ground noise, system imperfections impact the final measured voltage distribution. First, the transimpedance amplifier of the photodetectors do saturate for large input powers, effectively reducing the width of the distribution especially for large mean voltages as shown in **Fig. 2** of the main manuscript. We model the saturated signal f(x) of an input x with a saturation parameter :

Since f(x) is a differentiable, strictly monotonically increasing function, f-1(y) exists and the probability density function of the saturated output satisfies:

Here p(x) is the probability density function of the input, in this case the M-Bose-Einstein distribution of the optical intensity, see Eq. S.2. For a measured mean of , the mean of is:

Moreover, there is a limited extinction ratio from the modulators and additional ASE injected after modulation from the optical amplifiers. Consequently, light is present at the detector even if the symbol “0” is send. Both effects will shift the Bose-Einstein distribution by an amount . Combining both effects, the optical contribution to the measured noise distribution is:

Finally, we convolve the probability density distribution with the one of a zero mean Gaussian with standard deviation to also include the electronic noise as described in the main text. We fit the standard deviation of to the measured one shown in **Fig. 2**. For the fit parameter we find , , and . All “model” plots shown in main text deploy these fit parameters.

**Bayesian Neural Network tooling**

Both Bayesian Neural Networks (BNNs) presented in this work were built with the same software stack. The probabilistic programming language Pyro (*40*) is used as the primary tool for designing the BNNs. For quantization and discretization of values to certain bit widths the quantization aware training library Brevitas is utilized. Pyro and Brevitas both are built on top of PyTorch (*41*), a widely used machine learning library for Python (*42*). To speed up numerical computations for integrating the photonic PDF shown in Eq. S.7 we employ numba *(43)*, a just-in-time compiler for Python code. Finally, for hyperparamter searches, experiment tracking and to interface with our local compute infrastructure we use the experiment management library seml.

**Gaussian Bayesian Neural Network**

The network follows the overall design shown in **Fig. 5a** of the main text. Instead of the Sigmoid activation function used in the original LeNet-5 architecture this network uses rectified linear units (ReLU) as activation functions. To accelerate the off-chip training procedure, we only approximate the photonic system with a Gaussian BNN. **Extended Data Fig. 6a** shows how the probabilistic average pooling layer is implemented in Pyro. As the intensity of the chaotic light is positive by definition and the electronic digital to analog interface has a limited precision (maximum 8bit due to the arbitrary waveform generator), we choose a QuantReLU activation function. In this way, the input is mapped to an output activation between 0 and 1 with a 4bit uniform quantization. Apart from mapping the inputs to the correct range and deploying a reasonable number of bits for analog computing, we approximate the probabilistic sampling process. Instead of the complex probability distribution shown in Eq. S.7, we use Gaussian distributions. Furthermore, we approximate the dependency between standard deviation and mean for a single symbol by with and . Deploying the encoding scheme shown in **Fig. 2f** of the main text, the standard deviation of a distribution with mean can be tuned between

With the mean signal of the photo diode, =9 the number of uncorrelated symbols per distribution, and and fit values for the gaussian noise approximation, as observed with the hardware.

The BNN is then trained using the SVI implementation of Pyro with trace_ELBO as the loss function. We then use seml to find good hyperparamters, with the final settings being:

- Optimizer: ADAM
- Learning rate: 0.003162
- Batch size: 256
- Pyro guide: AutoDelta
- Pyro training and inference algorithm: SVI
- Loss: trace_ELBO
- Training samples: 10
- Initialization of noise levels ( in Fig. S6): 1.0
- Number of epochs: 225
- Seed of all involved random number generators at the start of the experiment: 42
- Compute device: CPU

All other parameters were left at their defaults, where applicable. In general, we find that the model shows good convergence over a wide range of learning rates, noise level initializations and for different optimizers. Of note is that while convergence with a low noise level initialization is good, a large initialization afterwards results in a more diverse distribution of noise levels and widens the final MI distribution for OOD samples shown in **Fig. 5e**. For the final model we find a wide final distribution of noise levels as shown in **Extended Data Fig. 6c**,in particular for the first average pooling layer.

**Photonic Bayesian Neural Network**

The photonic BNN adapts the parameters learned using the Gaussian BNN and is utilized to verify that the BNN still performs within expectation, when executed on the actual hardware. Schematically the implementation is shown in **Extended Data Fig. 6b**. Notably this implementation utilizes the full pipeline of generating patterns for the arbitrary waveform generator (AWG), stochastically rounding to hardware precision, average pooling within the photonic crossbar array and finally sampling of individual light pulses from the actual photonic PDF (Eq. S.7).

In the following the individual steps shown in **Extended Data Fig. 6b** are explained in detail:

- *QuantReLU:* Adapts the quantization from the gaussian BNN and ensures numerical compatibility.
- *AWG pattern generation:* Here the individual light pulse patterns for the arbitrary waveform generator employed in the photonic hardware are computed. The computation is dependent on the input from the previous layer () and the noise levels (L) learned by the gaussian BNN and the number of symbols per distribution (). Where the final pattern  (Eq. S12) can be described as follows using vector calculus:

- *Stochastic Quant:* Here the AWG patterns are rounded to four bit, using a standard stochastic rounding scheme, where the probability of rounding up or down depends on the distance of the value to be rounded to the nearest discrete level. This effectively reduces the bias from accumulating rounding errors, as would usually be the case with standard, fixed rounding.
- *Avg. Pool:* Standard PyTorch average pooling is applied, which approximates the photonic crossbar array. Due to the previous quantization only a deterministic number of result values (means) can exist afterwards, however the computation incurs floating-point errors, which makes static pre-computation of the photonic PDFs difficult.
- *Batched PDF sampling:* This operation dynamically requests the computation of new photonic PDFs, as new mean values appear, while suppressing rounding errors and dynamically caching existing PDFs, to reduce runtime overhead. Sampling from a precomputed PDF is then accomplished by resampling from the cumulative distribution function using uniformly distributed samples.
- *Summation of samples:* The samples drawn for each light pulse are summed together to form the final result. This result is then passed on to the following deterministic layers of the network.
